# Supplementary material
Source: PubMed Central journal article supplement (PMC3635463)
Supplement: supp_126.5.1218_JCS118521.pdf [file supp_126.5.1218_JCS118521.pdf]

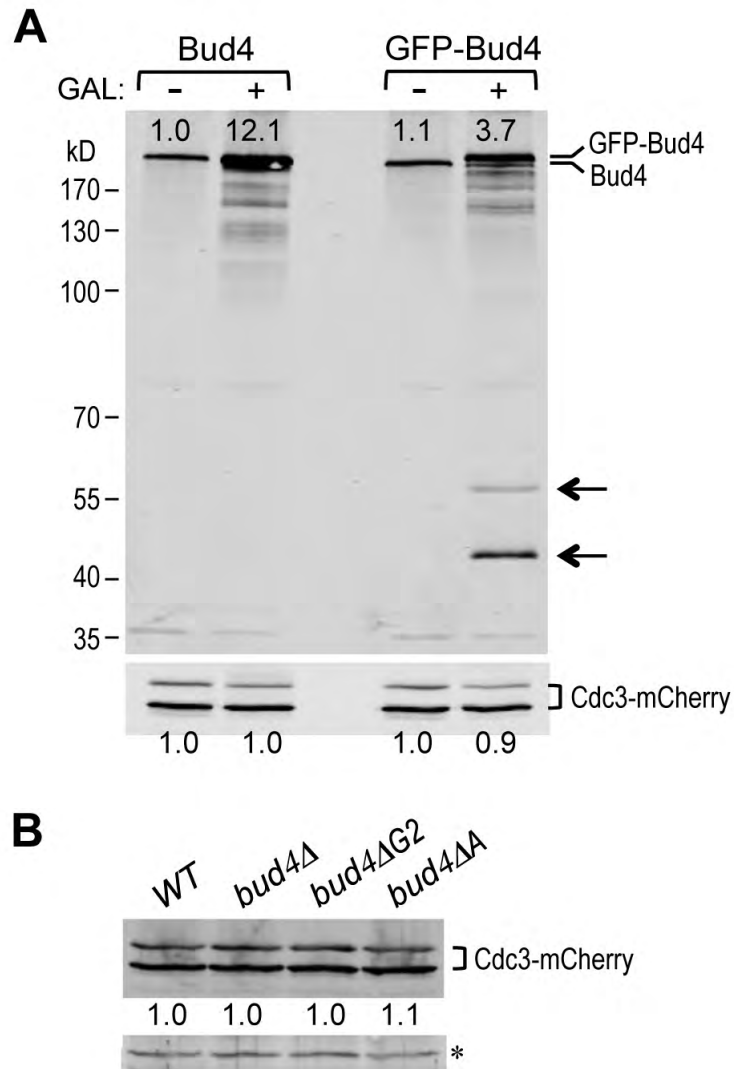

**Fig. S1. A.** The level of Bud4 and GFP-Bud4 expressed from the *GAL1* promoter. The *BUD4 CDC3-mCherry* strain (HPY2008) carrying pRD53-BUD4 or pRD53-GFP-BUD4 was grown in SC-URA media containing 2% raffinose (-), and then galactose was added (+; final 2%) for 6 hrs. Bud4 and GFP-Bud4 were detected by immunoblotting using polyclonal anti-Bud4 antibodies (upper panel); and Cdc3-mCherry was detected with anti-DsRED antibodies (lower panel). Numbers represent the relative protein levels normalized against Bud4 or Cdc3 shown in the first lane. The Bud4 and GFP-Bud4 levels were elevated about 12-fold and 3.3-fold, respectively, after induction with galactose, while the Cdc3-mCherry levels remained about the same. The lower level of GFP-Bud4 compared to Bud4 upon Gal induction might be partly due to degradation of GFP-Bud4 (see bands marked with arrows). **B.** The Cdc3-mCherry level in wild type and *bud4* mutants. Cdc3-mCherry was detected with anti-DsRED antibodies (upper panel), and Bem1 was detected with anti-Bem1 antibodies as a loading control (lower panel; marked with \*). Numbers represent the relative Cdc3-mCherry protein levels normalized against that in the wild-type strain.

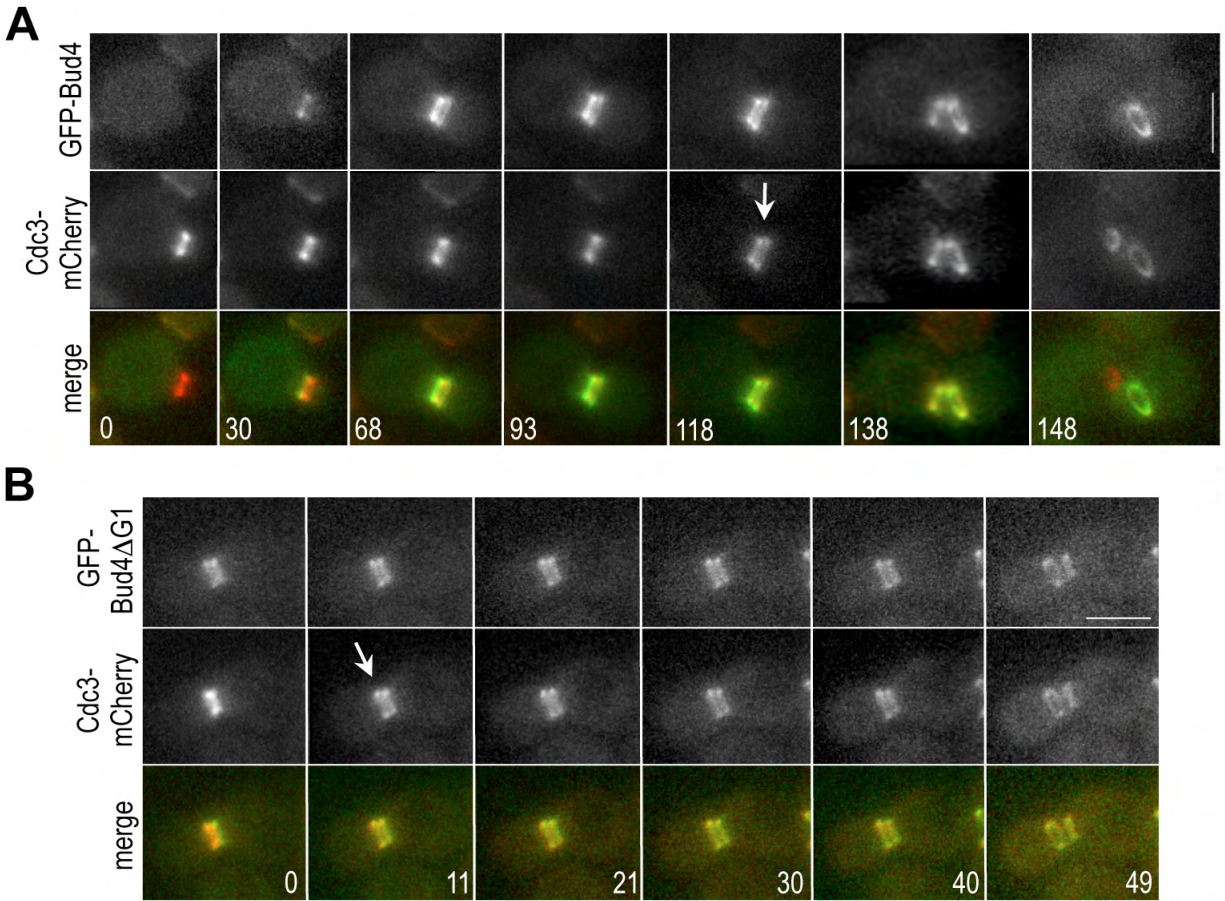

**Fig. S2.** Time-lapse images of cells expressing Cdc3-mCherry and (A) GFP-Bud4 (HPY2111) or (B) GFP-Bud4ΔG1 (HPY2176). Images were captured at 23°C, and relative time (in min) after the first image is shown. Arrows depict splitting of the septin ring at the beginning of cytokinesis. Note: GFP-Bud4 appears to form a double ring at the mother-bud neck before septin ring splitting. Scale bar: 3μm.

**Table S1. Yeast strains used in this study**

| Strain  |     | Relevant Genotype                                                                              | Source/Comments        |
|---------|-----|------------------------------------------------------------------------------------------------|------------------------|
| YEF473  | a/α | <i>his3-Δ200/his3-Δ200 leu2-Δ1/leu2-Δ1 lys2-801/lys2-801 trp1-Δ63/trp1-Δ63 ura3-52/ura3-52</i> | (Bi and Pringle, 1996) |
| HPY210  | a   |                                                                                                | (Singh et al., 2008)   |
| HPY1023 | a   | <i>bud4Δ::LEU2</i>                                                                             | (Kang et al., 2012)    |
| HPY1027 | a   | <i>bud4ΔG2-TRP1::bud4Δ::LEU2</i>                                                               | (Kang et al., 2012)    |
| HPY1032 | a   | <i>BUD4-TRP1::bud4Δ::LEU2</i>                                                                  | This study             |
| HPY1034 | a   | <i>GFP-BUD4-TRP1::bud4Δ::LEU2</i>                                                              | (Kang et al., 2012)    |
| HPY2000 | a   | <i>bud4Δ::kanMX4</i>                                                                           | This study             |
| HPY2008 | a   | <i>CDC3-mCherry-LEU2</i>                                                                       | This study             |
| HPY2053 | a   | <i>GFP-TUB1-URA3::ura3Δ CDC3-mCherry-LEU2</i>                                                  | This study             |
| HPY2088 | a   | <i>GFP-TUB1-URA3::ura3Δ CDC3-mCherry-LEU2 bud4Δ::kanMX4</i>                                    | This study             |
| HPY2099 | a   | <i>GFP-TUB1-URA3::ura3Δ CDC3-mCherry-LEU2 bud4ΔG2-TRP1::bud4Δ::kanMX4</i>                      | This study             |
| HPY2111 | a   | <i>GFP-BUD4-TRP1::bud4Δ::LEU2 CDC3-mCherry-LEU2</i>                                            | This study             |
| HPY2132 | a   | <i>GFP-bud4ΔN8-TRP1::bud4Δ::LEU2</i>                                                           | This study             |
| HPY2138 | a   | <i>bud4ΔN5-TRP1::bud4Δ::LEU2</i>                                                               | This study             |
| HPY2139 | a   | <i>bud4ΔA-TRP1::bud4Δ::kanMX4 CDC3-mCherry-LEU2 GFP-TUB1-URA3</i>                              | This study             |
| HPY2141 | a   | <i>bud4ΔA-TRP1::bud4Δ::LEU2</i>                                                                | This study             |
| HPY2152 | a   | <i>GFP-bud4ΔA-TRP1::bud4Δ::LEU2 CDC3-mCherry-LEU2</i>                                          | This study             |
| HPY2156 | a   | <i>bud4ΔN6-TRP1::bud4Δ::LEU2</i>                                                               | This study             |
| HPY2157 | a   | <i>bud4ΔN8-TRP1::bud4Δ::LEU2</i>                                                               | This study             |
| HPY2158 | a   | <i>GFP-bud4ΔN6-TRP1::bud4Δ::LEU2</i>                                                           | This study             |
| HPY2159 | a   | <i>GFP-bud4ΔN5-TRP1::bud4Δ::LEU2</i>                                                           | This study             |
| HPY2173 | a   | <i>bud4ΔG1-TRP1::bud4Δ::LEU2</i>                                                               | (Kang et al., 2012)    |
| HPY2176 | a   | <i>GFP-bud4ΔG1-TRP1::bud4Δ::kanMX4 CDC3-mCherry-LEU2</i>                                       | This study             |
| HPY2180 | a   | <i>bud4ΔB-TRP1::bud4Δ::LEU2</i>                                                                | This study             |
| HPY2181 | a   | <i>bud4ΔC-TRP1::bud4Δ::LEU2</i>                                                                | This study             |
| HPY2202 | a   | <i>GFP-bud4ΔA-TRP1::bud4Δ::LEU2 BUD3-mCherry- kanMX4</i>                                       | This study             |

|          |          |                                                               |                     |
|----------|----------|---------------------------------------------------------------|---------------------|
| HPY2207  | <b>a</b> | <i>bud4ΔD-TRP1::bud4Δ::LEU2</i>                               | This study          |
| HPY2217  | <b>a</b> | <i>GFP-BUD4-TRP1::bud4Δ::LEU2 BUD3-mCherry- kanMX4</i>        | (Kang et al., 2012) |
| HPY2249  | <b>a</b> | <i>GFP-bud4ΔG2-TRP1::bud4Δ::LEU2 BUD3-mCherry- kanMX4</i>     | This study          |
| HPY2218  | <b>a</b> | <i>GFP-bud4ΔE-TRP1::bud4Δ::kanMX4 CDC3-mCherry-LEU2</i>       | This study          |
| HPY2219  | <b>a</b> | <i>GFP-bud4ΔD-TRP1::bud4Δ::kanMX4 CDC3-mCherry-LEU2</i>       | This study          |
| HPY2220  | <b>a</b> | <i>bud4ΔN7-TRP1::bud4Δ::LEU2</i>                              | This study          |
| HPY2225  | <b>a</b> | <i>bud4ΔE-TRP1::bud4Δ::LEU2</i>                               | This study          |
| HPY2226  | <b>a</b> | <i>GFP-bud4ΔN7-TRP1::bud4Δ::kanMX4 CDC3-mCherry-LEU2</i>      | This study          |
| HPY2229  | <b>a</b> | <i>bud4ΔF-TRP1::bud4Δ::LEU2</i>                               | This study          |
| HPY2231  | <b>a</b> | <i>GFP-bud4ΔB-TRP1::bud4Δ::kanMX4 CDC3-mCherry-LEU2</i>       | This study          |
| HPY2232  | <b>a</b> | <i>GFP-bud4ΔC-TRP1::bud4Δ::kanMX4 CDC3-mCherry-LEU2</i>       | This study          |
| HPY2265  | <b>a</b> | <i>GFP-bud4ΔG2-TRP1::bud4Δ::kanMX4 CDC3-mCherry-LEU2</i>      | This study          |
| HPY2314  | <b>a</b> | <i>GFP-bud4ΔF-TRP1::bud4Δ::kanMX4 CDC3-mCherry-LEU2</i>       | This study          |
| HPY2323  | <b>a</b> | <i>GFP-bud4ΔI-TRP1::bud4Δ::kanMX4 CDC3-mCherry-LEU2</i>       | This study          |
| HPY2324  | <b>a</b> | <i>GFP-bud4ΔH-TRP1::bud4Δ::kanMX4 CDC3-mCherry-LEU2</i>       | This study          |
| HPY16*   | <b>a</b> | <i>ura3-52 trp1-Δ63 leu2 his3-ΔI pep4-3</i>                   | (Park et al., 1993) |
| HPY1511* | <b>a</b> | <i>BUD3-Myc<sub>13</sub>-kanMX6</i>                           | (Kang et al., 2012) |
| HPY1514* | <b>a</b> | <i>BUD3-Myc<sub>13</sub>-kanMX6 bud4Δ::LEU2</i>               | (Kang et al., 2012) |
| HPY2254* | <b>a</b> | <i>bud4ΔA-TRP1::bud4Δ::LEU2 BUD3-Myc<sub>13</sub>-kanMX6</i>  | This study          |
| HPY2255* | <b>a</b> | <i>bud4ΔE-TRP1::bud4Δ::LEU2 BUD3-Myc<sub>13</sub>-kanMX6</i>  | This study          |
| HPY1991* | <b>a</b> | <i>bud4ΔG2-TRP1::bud4Δ::LEU2 BUD3-Myc<sub>13</sub>-kanMX6</i> | This study          |

<sup>a</sup> All strains except that those marked with asterisk (\*) are congenic to YEF473 except as indicated. Strains marked with \* are congenic to HPY16 except as indicated.

**Table S2. Plasmids used in this study**

| Plasmid | Description <sup>1</sup>                                    | Source/Comments                                  |
|---------|-------------------------------------------------------------|--------------------------------------------------|
| pRD53   | <i>URA3</i> (CEN), <i>GALI</i> promoter                     | R. Deshaies (California Institute of Technology) |
| pAFS125 | pRS306-GFP-TUB1                                             | (Straight et al., 1997)                          |
| pBS34   | pFA6a-mCherry-kanMX6                                        | YRC, Univ. of Washington, Seattle                |
| pFJ115  | pRS413-P <sub>ADH2</sub> -HTB2-mCherry                      | (Egriboz et al., 2011)                           |
| pLP17   | LEU2 (CEN), CDC12-GFP                                       | (Lippincott and Li, 1998)                        |
|         | YIplac128-CDC3-mCherry (LEU2)                               | (Tong et al., 2007)                              |
| pHP1392 | pRS304*(= pRS304 lacking the <i>NotI</i> site)- <i>BUD4</i> | (Kang et al., 2012)                              |
| pHP1400 | pRS304*- <i>NotI</i> - <i>BUD4</i>                          | (Kang et al., 2012)                              |
| pHP1851 | pRS304*- <i>NotI</i> - <i>bud4ΔG1</i> (Δ aa 1175 - 1182)    | (Kang et al., 2012)                              |
| pHP1395 | pRS304*- <i>bud4ΔG2</i> (Δ aa 1344 - 1404)                  | (Kang et al., 2012)                              |
| pHP1401 | pRS304*- <i>GFP</i> - <i>BUD4</i>                           | (Kang et al., 2012)                              |
| pHP1854 | pRS304*- <i>GFP</i> - <i>bud4ΔG1</i> (Δ aa 1175 – 1182)     | (Kang et al., 2012)                              |
| pHP1403 | pRS304*- <i>GFP</i> - <i>bud4ΔG2</i> (Δ aa 1344 - 1404)     | (Kang et al., 2012)                              |
| pHP1430 | pRD53-BUD4                                                  | This study                                       |
| pHP1819 | pRD53*(= pRD53 lacking the <i>NotI</i> site)-GFP-BUD4       | This study <sup>3</sup>                          |
| pHP1800 | pRS304*- <i>NotI</i> - <i>bud4ΔN5</i> (Δ aa 2 – 510)        | This study <sup>2</sup>                          |
| pHP1480 | pRS304*- <i>NotI</i> - <i>bud4ΔN6</i> (Δ aa 2 – 883)        | This study <sup>2</sup>                          |
| pHP1887 | pRS304*- <i>NotI</i> - <i>bud4ΔN7</i> (Δ aa 2 – 1000)       | This study <sup>2</sup>                          |
| pHP1481 | pRS304*- <i>NotI</i> - <i>bud4ΔN8</i> (Δ aa 2 – 1081)       | This study <sup>2</sup>                          |
| pHP1845 | pRS304*- <i>GFP</i> - <i>bud4ΔN5</i> (Δ aa 2 – 510)         | This study <sup>3</sup>                          |
| pHP1843 | pRS304*- <i>GFP</i> - <i>bud4ΔN6</i> (Δ aa 2 – 883)         | This study <sup>3</sup>                          |
| pHP1889 | pRS304*- <i>GFP</i> - <i>bud4ΔN7</i> (Δ aa 2 – 1000)        | This study <sup>3</sup>                          |

|         |                                                |                          |
|---------|------------------------------------------------|--------------------------|
| pHP1834 | pRS304*- <i>GFP-bud4ΔN8</i> (Δ aa 2 – 1081)    | This study <sup>3</sup>  |
| pHP1835 | pRS316*- <i>NotI-bud4ΔA</i> (Δ aa 1069 – 1163) | This study <sup>4</sup>  |
| pHP1836 | pRS304*- <i>GFP-bud4ΔA</i> (Δ aa1069 – 1163)   | This study <sup>4</sup>  |
| pHP1837 | pRS304*- <i>NotI-bud4ΔA</i> (Δaa1069 – 1163)   | This study <sup>4</sup>  |
| pHP1864 | pRS304*- <i>GFP-bud4ΔB</i> (Δ aa 805 – 997)    | This study <sup>5</sup>  |
| pHP1866 | pRS304*- <i>NotI-bud4ΔB</i> (Δ aa 805 – 997)   | This study <sup>5</sup>  |
| pHP1865 | pRS304*- <i>GFP-bud4ΔC</i> (Δ aa 989 – 1447)   | This study <sup>6</sup>  |
| pHP1867 | pRS304*- <i>NotI-bud4ΔC</i> (Δ aa 989 – 1447)  | This study <sup>6</sup>  |
| pHP1881 | pRS304*- <i>NotI-bud4ΔD</i> (Δ aa 530 – 811)   | This study <sup>7</sup>  |
| pHP1886 | pRS304*- <i>GFP-bud4ΔD</i> (Δ aa 530 – 811)    | This study <sup>3</sup>  |
| pHP1882 | pRS316*- <i>NotI-bud4ΔE</i> (Δ aa1306 - 1328)  | This study <sup>8</sup>  |
| pHP1885 | pRS304*- <i>GFP-bud4ΔE</i> (Δ aa 1306 - 1328)  | This study <sup>8</sup>  |
| pHP1888 | pRS304*- <i>NotI-bud4ΔE</i> (Δ aa 1306 - 1328) | This study <sup>8</sup>  |
| pHP1893 | pRS304*- <i>NotI-bud4ΔF</i> (Δ aa 530 – 997)   | This study <sup>9</sup>  |
| pHP1909 | pRS304*- <i>GFP-bud4ΔF</i> (Δ aa 530 – 997)    | This study <sup>3</sup>  |
| pHP1914 | pRS304*- <i>GFP-bud4ΔH</i> (aa 511 - 988)      | This study <sup>10</sup> |
| pHP1913 | pRS304*- <i>GFP-bud4ΔI</i> (aa 511 - 804)      | This study <sup>11</sup> |

<sup>1</sup>Residues deleted in each *bud4* allele are indicated after ‘Δ aa’ in each plasmid whereas the residues remaining in *bud4ΔH* and *bud4ΔI* are indicated after ‘aa’.

<sup>2</sup>The N-terminal deletion mutations of *bud4* were generated by PCR. First, separate PCR reactions were carried out using pHP1392 as a template and primers oBUD412 (5'-CCGCGGATCCAAGCTTCCCAC CCTTACC-3') and oBUD431 (5'- GACACGCGGCCG CAGTGAAATTGGTGTGCGAC-3') for *NotI-bud4ΔN5*; and primers oBUD412 and oBUD432 (5'- GTACCGCGGCCG CATAAGAAAGCAACC TATTG-3') for *NotI-bud4ΔN6*; and primers oBUD412 and oBUD455 (5'-CACACGCGGCCGCGTC GTGAAAGCTGGAAACAAAC -3') for *NotI-bud4ΔN7* and primers oBUD412 and oBUD433 (5'- G

AGAGGCGGCCGCACGCTTGCATTATATGGAAC-3') for *NotI*-*bud4ΔN8*. The PCR products were digested with *NotI* and *BamHI*, and then ligated with pHP1400 digested with *NotI* and *BamHI*.

<sup>3</sup> The 720-bp *NotI* fragment encoding GFP<sup>S65T,V163A,S175G</sup> from pRS304-GFP-RSR1 (Park et al., 2002) was cloned into the *NotI* site for GFP-tagging.

<sup>4</sup> The *bud4ΔA* mutation was generated by PCR using pHP1400 as a template and primers oBUD452 (5'-CACCTCCGGAATTGGTCGAAATAGTAGAC-3') and oBUD412. The PCR product was digested with *BspEI* and *BamHI*, and then cloned into the same sites of pRS316\*(= pRS316 lacking the *NotI* site) -*NotI*-BUD4, yielding pHP1835. The 2.87-kb *Sall*-*BamHI* fragment of pHP1403 was then replaced with the 2.77-kb *Sall*-*BamHI* fragment of pHP1835, yielding pHP1836. The 720-bp *NotI* fragment encoding GFP from pHP1836 was removed, yielding pHP1837.

<sup>5</sup> The *GFP-bud4ΔB* mutation was generated by two-step PCR strategy. First, separate PCR reactions were carried out using pHP1392 as a template and primers oBUD431 and oBUD448 (5'-GGTTCGCGC GCAATTCAGCTTCGTCCTGGG -3'); and primers oBUD451 (5'-CGCGAGCGCGCCCTTCAAG GTCGTGAAAGCTGGAAAC-3') and oBUD412. The PCR products were ligated together after *BssHIII* digestion, and then used as template in the second PCR with primers oBUD431 and oBUD412. The resulting product was digested with *Sall* and *BamHI*, and then replaced with the 3.05-kb *Sall*-*BamHI* fragment of pHP1401, yielding pHP1864. The GFP moiety was then removed from pHP1864 by *NotI* digestion and self-ligation, yielding pHP1866.

<sup>6</sup> The *GFP-bud4ΔC* mutation was generated by two-step PCR strategy. First, separate PCR reactions were carried out using pHP1392 as a template and primers oBUD431 and oBUD450 (5'-GGTTGGCG CGCTATACTACGAACTGGAGTGG-3'); and primers oBUD454 (5'-GCAGGCGCGCGAAGTATA AATTTGAAAAGAAGTATGTACAG-3') and oBUD412. The PCR products were ligated together after *BssHIII* digestion, and then processed for the second PCR with primers oBUD431 and oBUD412, and the resulting product was replaced with the 3.05-kb *Sall*-*BamHI* fragment of pHP1401 as described above <sup>5</sup>, yielding pHP1865. The GFP moiety was then removed from pHP1865 as described above <sup>5</sup>, yielding pHP1867.

<sup>7</sup> The *bud4ΔD* mutation was generated by two-step PCR strategy. First, separate PCR reactions were carried out using pHP1343 as a template and primers oBUD419 (5'- GCCTGGGCGGCCCGCCACGA CGCAGAGAGTACCGTAG-3') and oBUD446 (5'-GAGTCGCGCGCTTTTGCCAATGGTTCATTC ACTTCAG-3'); and primers oBUD449 (5'- GGAGGGCGCGCGGGGTGATATCACTTTTAATAGG GG-3') and oBUD412. The PCR products were ligated together after *BssHIII* digestion, and then used as

template in the second PCR with primers oBUD419 and oBUD412. The PCR product was digested with *SalI* and *BamHI*, and then cloned into the same sites of pHP1400, yielding pHP1881.

<sup>8</sup>The *bud4ΔE* mutation was generated by two-step PCR strategy. First, separate PCR reactions were carried out using pHP1343 as a template and primers oBUD47 (5'-CCGCCACCTTCCATAAGAAAG C-3') and oBUD456 (5'-GGTGGGCGCGCTTTATAGATATTTTGTGCAACTTGTATTTGG-3'); and primers oBUD457 (5'-TCGGTGCGCGCGGCTCGCAACTTTCTGGTTATC-3') and oBUD412. The PCR products were ligated together after *BssHII* digestion, and then used as template in the second PCR with primers oBUD47 and oBUD412. The PCR product was digested with *BspEI* and *BamHI*, and then cloned into the same sites of pRS316\*-*NotI*-BUD4, yielding pHP1882. The 2.87-kb *SalI*-*BamHI* fragment of pHP1403 was then replaced with the 2.94-kb *SalI*-*BamHI* fragment of pHP1882, yielding pHP1885. The GFP moiety was removed from pHP1885 as described above <sup>5</sup>, yielding pHP1888.

<sup>9</sup>The *bud4ΔF* mutation was generated by combining *bud4ΔB* and *bud4ΔD*. The larger DNA fragment from pHP1866 digested with *NotI* and *BssHII* was ligated with the 1.6-kb DNA fragment from pHP1881 digested with the same enzymes, yielding pHP1893.

<sup>10</sup>The *GFP-bud4ΔH* mutation was generated by PCR using pHP1867 as a template and primers oBUD431 and oBUD412. The PCR product was digested with *SalI* and *BamHI*, and then replaced with the 3.05-kb *SalI*-*BamHI* fragment of pHP1845.

<sup>11</sup>The *GFP-bud4ΔI* mutation was generated by two-step PCR strategy. First, separate PCR reactions were carried out using pHP1867 as a template and primers oBUD431 and oBUD448; and primers oBUD454 and oBUD412. The PCR products were ligated together after *BssHII* digestion, and then used as template in the second PCR with primers oBUD431 and oBUD412. The resulting product was digested with *SalI* and *BamHI*, and then replaced with the 3.05-kb *SalI*-*BamHI* fragment of pHP1845.
